# Supplementary material for: Decarbonylation of phenylacetic acids by high valent transition metal halides
Source: Royal Society of Chemistry journal article supplement (doi:10.1039/c9dt00551j), 2019-01-01

# Decarbonylation of Phenylacetic Acids by High Valent Transition Metal Halides

*Niccolò Bartalucci, Fabio Marchetti, Stefano Zacchini, Guido Pampaloni*

## Supporting Information

| <b><u>Table of contents</u></b>                                                                                                                                    | <i>Pages</i> |
|--------------------------------------------------------------------------------------------------------------------------------------------------------------------|--------------|
| Spectroscopic data of carboxylic acids                                                                                                                             | S2           |
| <b>Figure S1, Table S1:</b> ORTEP drawing of <b>6</b> , and selected bonding parameters                                                                            | S4           |
| <b>Figure S2, Tables S2-S3:</b> ORTEP drawing of <b>8</b> , and selected bonding parameters                                                                        | S5           |
| <b>Figure S3, Tables S4-S5:</b> ORTEP drawing of $\text{CPh}_2(\text{CH}_2\text{CH}_2\text{Br})\text{CO}_2\text{H}$ ( <b>A1</b> ), and selected bonding parameters | S6           |
| <b>Figure S4, Tables S6-S7:</b> ORTEP drawing of $\text{CPh}_2(\text{CH}_2\text{CH}_3)\text{CO}_2\text{H}$ ( <b>A2</b> ), and selected bonding parameters          | S7           |
| <b>Figures S5-S32:</b> NMR spectra of products                                                                                                                     | S8-S15       |
| <b>Figures S33-S39:</b> IR spectra of products                                                                                                                     | S16-S18      |

### Spectroscopic data of carboxylic acids.

**A) CPh<sub>3</sub>CO<sub>2</sub>H.** IR (solid state):  $\nu/\text{cm}^{-1} = 3056\text{w}, 2789\text{w}, 2611\text{w}, 1693\text{vs} (\text{C}=\text{O}), 1597\text{w}, 1488\text{m}, 1445\text{m}, 1405\text{w}, 1282\text{m-sh}, 1258\text{m}, 1190\text{w-m}, 1084\text{w}, 1035\text{w}, 1002\text{w}, 943\text{w-br}, 906\text{w}, 759\text{m}, 733\text{s}, 697\text{vs}, 667\text{m-s}$ . <sup>1</sup>H NMR (dms<sub>o</sub>-d<sub>6</sub>):  $\delta/\text{ppm} = 7.28, 7.15 (\text{m}, 15 \text{ H}, \text{Ph}); 3.5 (\text{br}, 1 \text{ H}, \text{OH})$ . <sup>13</sup>C{<sup>1</sup>H} NMR (dms<sub>o</sub>-d<sub>6</sub>):  $\delta/\text{ppm} = 174.8 (\text{C}=\text{O}); 143.7 (\text{ipso-Ph}), 130.4, 128.1, 127.1 (\text{Ph}); 67.4 (\text{CPh}_3)$ .

**B) CMe(Ph)<sub>2</sub>CO<sub>2</sub>H.** IR (solid state):  $\nu/\text{cm}^{-1} = 3088\text{w}, 3063\text{w}, 3024\text{w}, 3003\text{w}, 2985\text{w}, 2945\text{w}, 2825\text{w}, 1697\text{s} (\text{C}=\text{O}), 1598\text{w}, 1581\text{w}, 1494\text{m}, 1462\text{w-m}, 1445\text{m}, 1409\text{w-m}, 1379\text{w}, 1293\text{m}, 1275\text{m-s}, 1213\text{w-m}, 1200\text{w-m}, 1125\text{w-m}, 1070\text{w-m-sh}, 1052\text{w}, 1030\text{w-m}, 937\text{m-br}, 922\text{m}, 882\text{w}, 838\text{w}, 773\text{w}, 757\text{m-s}, 734\text{m-s}, 697\text{vs}, 657\text{m-s}$   $\text{cm}^{-1}$ . <sup>1</sup>H NMR (CDCl<sub>3</sub>):  $\delta/\text{ppm} = 7.36\text{-}7.25 (10 \text{ H}, \text{Ph}); 1.95 (\text{s}, 3 \text{ H}, \text{Me})$ . <sup>13</sup>C{<sup>1</sup>H} NMR (CDCl<sub>3</sub>):  $\delta/\text{ppm} = 180.9 (\text{OCO}); 144.4 (\text{ipso-Ph}); 128.7, 128.6, 127.6 (\text{Ph}); 56.9 (\text{CPh}_2); 27.2 (\text{Me})$ .

**C) CMe<sub>2</sub>(Ph)CO<sub>2</sub>H.** IR (solid state):  $\nu/\text{cm}^{-1} = 2974\text{w}, 2115\text{w}, 1694\text{vs} (\text{C}=\text{O}), 1497\text{w}, 1471\text{w}, 1446\text{w}, 1438\text{w}, 1404\text{w}, 1365\text{w}, 1293\text{m}, 1176\text{w}, 1160\text{w-m}, 1102\text{w}, 1078\text{w}, 1030\text{w}, 1013\text{w}, 938\text{m}, 840\text{w}, 776\text{w}, 756\text{w}, 731\text{m}, 697\text{s}$   $\text{cm}^{-1}$ . <sup>1</sup>H NMR (CDCl<sub>3</sub>):  $\delta/\text{ppm} = 7.43 (\text{d}, {}^3J_{\text{HH}} = 7.6 \text{ Hz}, 2 \text{ H}, \text{ortho H}); 7.37 (\text{t}, {}^3J_{\text{HH}} = 7.6 \text{ Hz}, 2 \text{ H}, \text{meta H}); 7.29 (\text{d}, {}^3J_{\text{HH}} = 7.2 \text{ Hz}, 1 \text{ H}, \text{para H}); 1.63 (\text{s}, 3\text{H}); 1.63 (\text{s}, 6 \text{ H}, \text{Me})$ . <sup>13</sup>C{<sup>1</sup>H} NMR (CDCl<sub>3</sub>):  $\delta/\text{ppm} = 182.9 (\text{C}=\text{O}); 143.8 (\text{ipso-Ph}); 128.5, 127.0, 125.8 (\text{Ph}); 46.3 (\text{CMe}_2); 26.2 (\text{Me})$ .

**D) CPh<sub>2</sub>(CH<sub>2</sub>CH<sub>2</sub>Br)CO<sub>2</sub>H.** IR (solid state):  $\nu/\text{cm}^{-1} = 3058\text{w}, 2983\text{w}, 2932\text{w}, 2815\text{w}, 2684\text{w}, 2639\text{w}, 2516\text{w}, 1958\text{w}, 1900\text{w}, 1815\text{w}, 1771\text{w}, 1702\text{vs}, 1599\text{w-m}, 1494\text{m-s}, 1440\text{m-sh}, 1402\text{m}, 1335\text{w}, 1306\text{w-m}, 1270\text{s}, 1229\text{w}, 1209\text{w}, 1178\text{w}, 1162\text{w}, 1147\text{w-m}, 1088\text{w}, 1066\text{w}, 1034\text{w}, 1015\text{w-m}, 915\text{m-br}, 841\text{w}, 785\text{w-m}, 756\text{s}, 740\text{m}, 726\text{m-s}, 687\text{vs}$   $\text{cm}^{-1}$ . <sup>1</sup>H NMR (CDCl<sub>3</sub>):  $\delta/\text{ppm} = 10.58 (\text{br}, 1 \text{ H}, \text{OH}); 7.40\text{-}7.31 (\text{m}, 10 \text{ H}, \text{Ph}); 3.15\text{-}3.11 (\text{m}, 2 \text{ H}, \text{BrCH}_2); 3.01\text{-}2.97 (\text{m}, 2 \text{ H}, \text{CH}_2)$ . <sup>13</sup>C{<sup>1</sup>H} NMR (CDCl<sub>3</sub>):  $\delta/\text{ppm} = 179.9 (\text{C}=\text{O}); 141.0 (\text{ipso-Ph}); 128.7, 128.4, 127.6 (\text{Ph}); 60.6 (\text{CPh}_2); 41.6 (\text{CH}_2); 28.8 (\text{BrCH}_2)$ .

**E) CHPh<sub>2</sub>CO<sub>2</sub>H.** IR (solid state):  $\nu/\text{cm}^{-1} = 3025\text{w}, 2903\text{w}, 2703\text{w}, 2604\text{w}, 1956\text{w}, 1699\text{s} (\text{C}=\text{O}), 1600\text{w-m}, 1581\text{w}, 1497\text{m}, 1449\text{m-sh}, 1410\text{m}, 1314\text{m-sh}, 1282\text{w}, 1222\text{s}, 1183\text{w-br}, 1080\text{w}, 1033\text{w-}$

m, 1003w, 933m-s-br, 886w, 768w, 749m-s, 731s, 695vs, 666m-s  $\text{cm}^{-1}$ .  $^1\text{H}$  NMR ( $\text{CDCl}_3$ ):  $\delta/\text{ppm}$  = 11.2 (s, br, 1 H, OH); 7.74 – 6.98 (m, 10 H, Ph); 5.11 (s, 1 H, CH).  $^{13}\text{C}\{^1\text{H}\}$  NMR ( $\text{CDCl}_3$ ):  $\delta/\text{ppm}$  = 179.0 (C=O); 137.9, 128.7, 127.6 (Ph); 57.1 (CH).

**F) MeC $\equiv$ CCO $_2$ H.** IR (solid state):  $\nu/\text{cm}^{-1}$  = 2801w, 2624m, 2479w-m, 2321w, 2246vs (C $\equiv$ C), 2138w-m, 2041w, 1997w, 1699s (C=O), 1661s, 1635s, 1567m-s, 1506w, 1439w-m, 1399s, 1368m, 1242vs-br, 1074m-s, 1025w-m, 854m-s-br, 778s, 751vs, 731s  $\text{cm}^{-1}$ .  $^1\text{H}$  NMR ( $\text{CDCl}_3$ ):  $\delta/\text{ppm}$  = 11.33 (s, 1H, OH); 2.01 (s, 3 H, Me).  $^{13}\text{C}\{^1\text{H}\}$  NMR ( $\text{CDCl}_3$ ):  $\delta/\text{ppm}$  = 158.6 (C=O); 88.8(CO–C $\equiv$ C); 71.9(C $\equiv$ C–Me); 3.8 (Me).

**Figure S1.** ORTEP drawing of the structure of **6**. Displacement ellipsoids are at the 50% probability level.

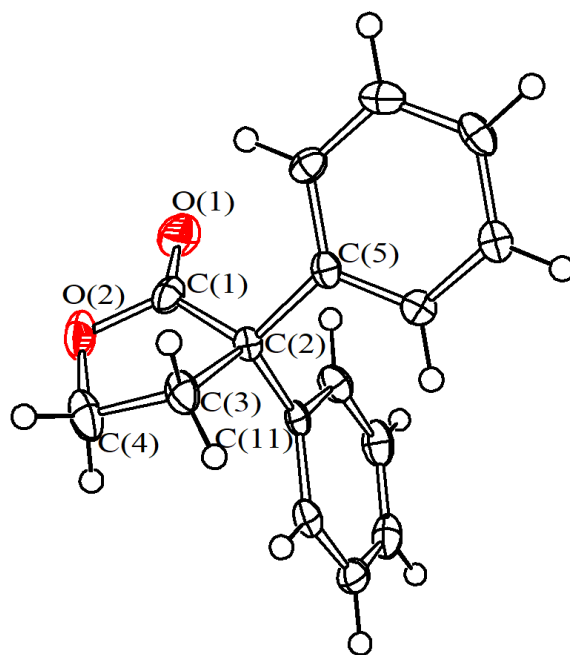

**Table S1.** Selected bond lengths (Å) and angles (deg) for **6**.

|                |          |                 |          |
|----------------|----------|-----------------|----------|
| C(1)-O(1)      | 1.187(4) | C(1)-O(2)       | 1.341(4) |
| C(1)-C(2)      | 1.538(5) | C(2)-C(3)       | 1.541(4) |
| C(3)-C(4)      | 1.510(5) | C(4)-O(2)       | 1.454(5) |
| C(2)-C(5)      | 1.532(4) | C(2)-C(11)      | 1.540(5) |
|                |          |                 |          |
| O(2)-C(1)-C(2) | 128.5(3) | O(2)-C(1)-O(1)  | 121.9(3) |
| O(1)-C(1)-C(2) | 109.6(3) | C(1)-C(2)-C(3)  | 100.9(3) |
| C(2)-C(3)-C(4) | 102.3(3) | C(3)-C(4)-O(2)  | 104.3(3) |
| C(4)-O(2)-C(1) | 110.9(3) | C(5)-C(2)-C(11) | 110.5(3) |

**Figure S2.** ORTEP drawing of the structure of MeC(Cl)=CHCO<sub>2</sub>H, **8**. Displacement ellipsoids are at the 50% probability level.

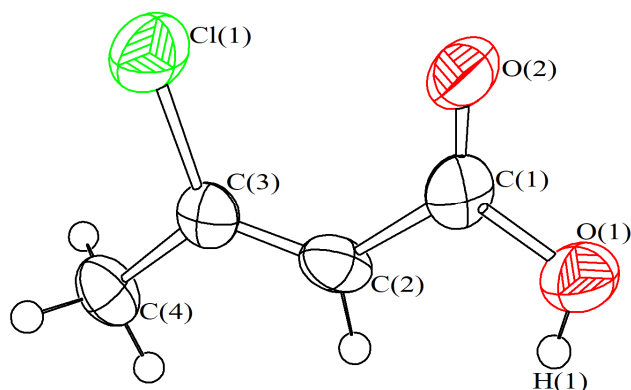

**Table S2.** Selected bond lengths (Å) and angles (deg) for MeC(Cl)=CHCO<sub>2</sub>H, **8**.

|                 |           |                 |           |
|-----------------|-----------|-----------------|-----------|
| C(1)-O(1)       | 1.351(13) | C(1)-O(2)       | 1.179(13) |
| C(1)-C(2)       | 1.507(15) | C(2)-C(3)       | 1.331(14) |
| C(3)-C(4)       | 1.496(14) | C(3)-Cl(1)      | 1.709(12) |
|                 |           |                 |           |
| O(1)-C(1)-O(2)  | 122.5(10) | O(1)-C(1)-C(2)  | 109.2(11) |
| O(2)-C(1)-C(2)  | 128.3(10) | C(1)-C(2)-C(3)  | 126.8(11) |
| C(2)-C(3)-C(4)  | 122.9(11) | C(2)-C(3)-Cl(1) | 122.6(9)  |
| C(4)-C(3)-Cl(1) | 114.5(8)  |                 |           |

**Table S3.** Hydrogen bonds for MeC(Cl)=CHCO<sub>2</sub>H, **8** [Å and deg].

| D-H...A             | d(D-H) | d(H...A) | d(D...A)  | <(DHA) |
|---------------------|--------|----------|-----------|--------|
| O(1)-H(1)...Cl(1)#1 | 0.82   | 2.62     | 3.370(12) | 153.5  |

Symmetry transformations used to generate equivalent atoms: #1  $x-1/2, -y+1/2, z+1/2$ .

**Figure S3.** ORTEP drawing of the structure of  $\text{CPh}_2(\text{CH}_2\text{CH}_2\text{Br})\text{CO}_2\text{H}$  (**A1**). Displacement ellipsoids are at the 50% probability level.

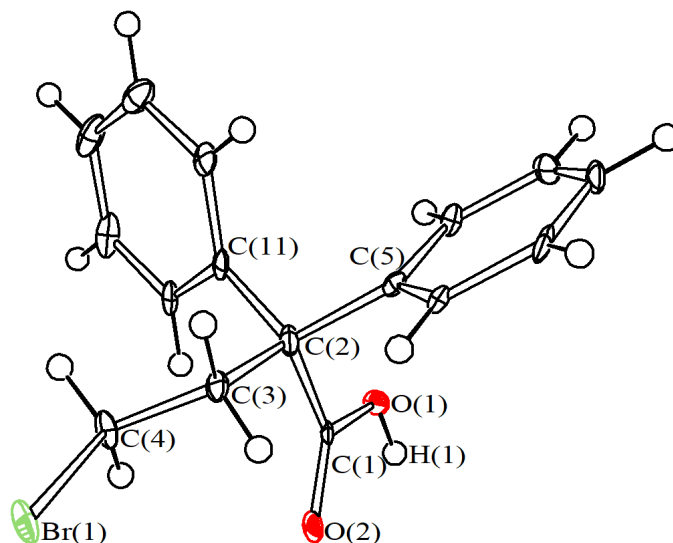

**Table S4.** Selected bond lengths (Å) and angles (deg) for  $\text{CPh}_2(\text{CH}_2\text{CH}_2\text{Br})\text{CO}_2\text{H}$ , **A1**.

|                 |          |                 |          |
|-----------------|----------|-----------------|----------|
| C(1)-O(1)       | 1.307(6) | C(1)-O(2)       | 1.222(6) |
| C(1)-C(2)       | 1.539(6) | C(2)-C(3)       | 1.548(7) |
| C(3)-C(4)       | 1.520(7) | C(4)-Br(1)      | 1.965(5) |
| C(2)-C(5)       | 1.541(7) | C(2)-C(11)      | 1.544(7) |
|                 |          |                 |          |
| O(1)-C(1)-O(2)  | 123.9(4) | O(1)-C(1)-C(2)  | 114.0(4) |
| O(2)-C(1)-C(2)  | 122.1(4) | C(1)-C(2)-C(3)  | 109.1(4) |
| C(2)-C(3)-C(4)  | 112.8(4) | C(3)-C(4)-Br(1) | 108.6(3) |
| C(5)-C(2)-C(11) | 111.6(4) |                 |          |

**Table S5.** Hydrogen bonds for  $\text{CPh}_2(\text{CH}_2\text{CH}_2\text{Br})\text{CO}_2\text{H}$ , **A1** [Å and deg].

| D-H...A            | d(D-H) | d(H...A) | d(D...A) | <(DHA) |
|--------------------|--------|----------|----------|--------|
| O(1)-H(1)...O(2)#1 | 0.84   | 1.80     | 2.637(5) | 170.8  |

Symmetry transformations used to generate equivalent atoms: #1 -x+1,-y+1, -z.

**Figure S4.** ORTEP drawing of the structure of  $\text{CPh}_2(\text{CH}_2\text{CH}_3)\text{CO}_2\text{H}$ , **A2**. Displacement ellipsoids are at the 50% probability level.

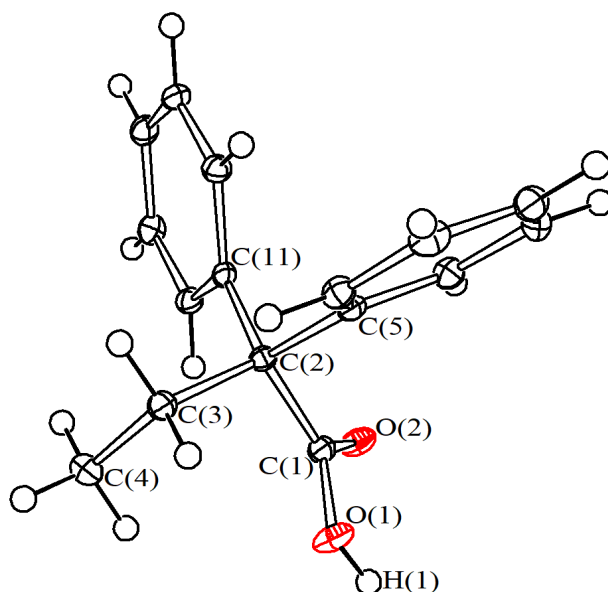

**Table S6.** Selected bond lengths (Å) and angles (deg) for  $\text{CPh}_2(\text{CH}_2\text{CH}_3)\text{CO}_2\text{H}$ , **A2**.

|                |            |                 |            |
|----------------|------------|-----------------|------------|
| C(1)-O(1)      | 1.3300(18) | C(1)-O(2)       | 1.2330(18) |
| C(1)-C(2)      | 1.5436(18) | C(2)-C(3)       | 1.563(2)   |
| C(3)-C(4)      | 1.536(2)   |                 |            |
| C(2)-C(5)      | 1.557(2)   | C(2)-C(11)      | 1.547(2)   |
|                |            |                 |            |
| O(1)-C(1)-O(2) | 122.48(11) | O(1)-C(1)-C(2)  | 113.02(11) |
| O(2)-C(1)-C(2) | 124.40(12) | C(1)-C(2)-C(3)  | 109.13(11) |
| C(2)-C(3)-C(4) | 114.38(10) | C(5)-C(2)-C(11) | 109.70(10) |

**Table S7.** Hydrogen bonds for  $\text{CPh}_2(\text{CH}_2\text{CH}_3)\text{CO}_2\text{H}$ , **A2** [Å and deg].

| D-H...A            | d(D-H) | d(H...A) | d(D...A) | <(DHA) |
|--------------------|--------|----------|----------|--------|
| O(1)-H(1)...O(2)#1 | 0.84   | 1.85     | 2.681(2) | 173.3  |

Symmetry transformations used to generate equivalent atoms: #1 -x+2, -y+1, -z+1.

**Figure S17.**  $^1\text{H}$  NMR spectrum (401 MHz,  $\text{CD}_2\text{Cl}_2$ ) of  $[\text{CPh}_3][\text{MoOCl}_4]$ , **1**.

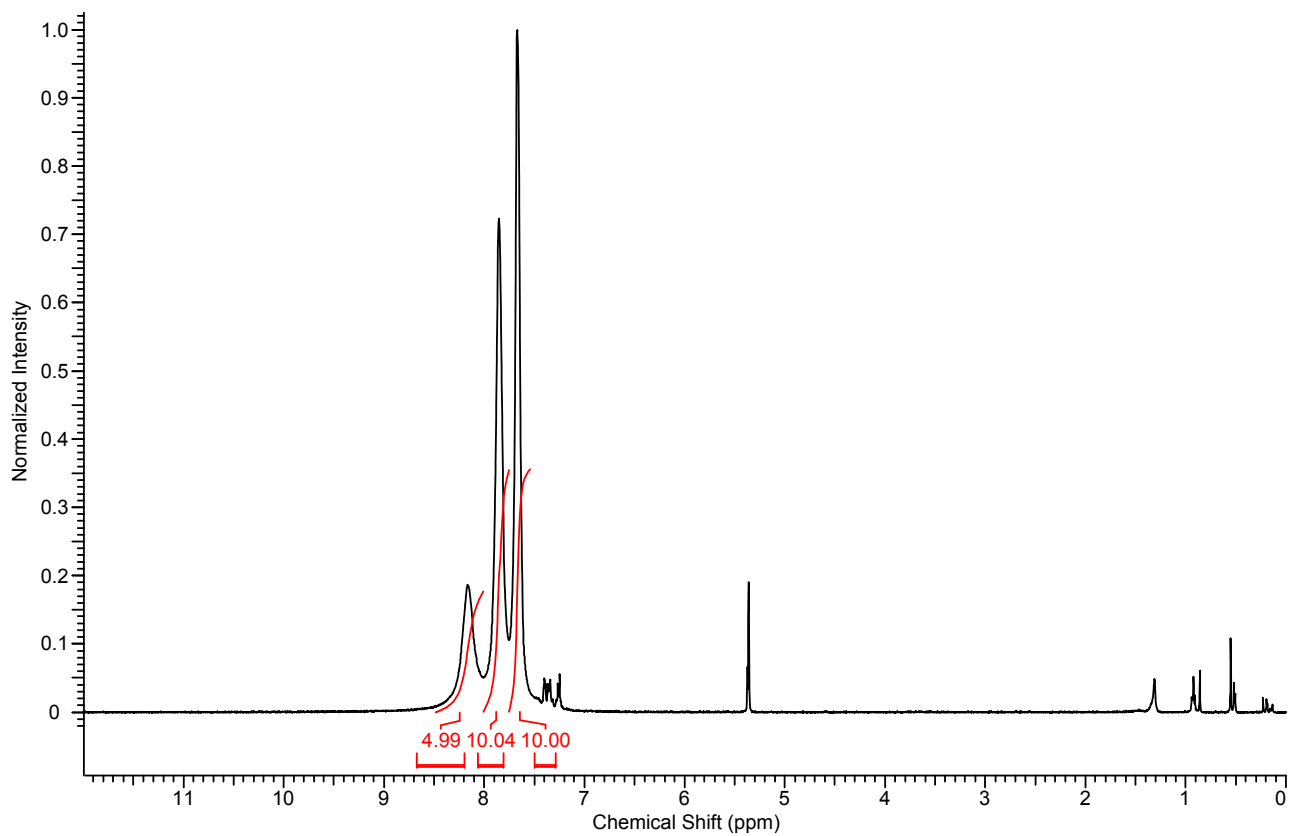

**Figure S18.**  $^{13}\text{C}\{^1\text{H}\}$  NMR spectrum (101 MHz,  $\text{CD}_2\text{Cl}_2$ ) of  $[\text{CPh}_3][\text{MoOCl}_4]$ , **1**.

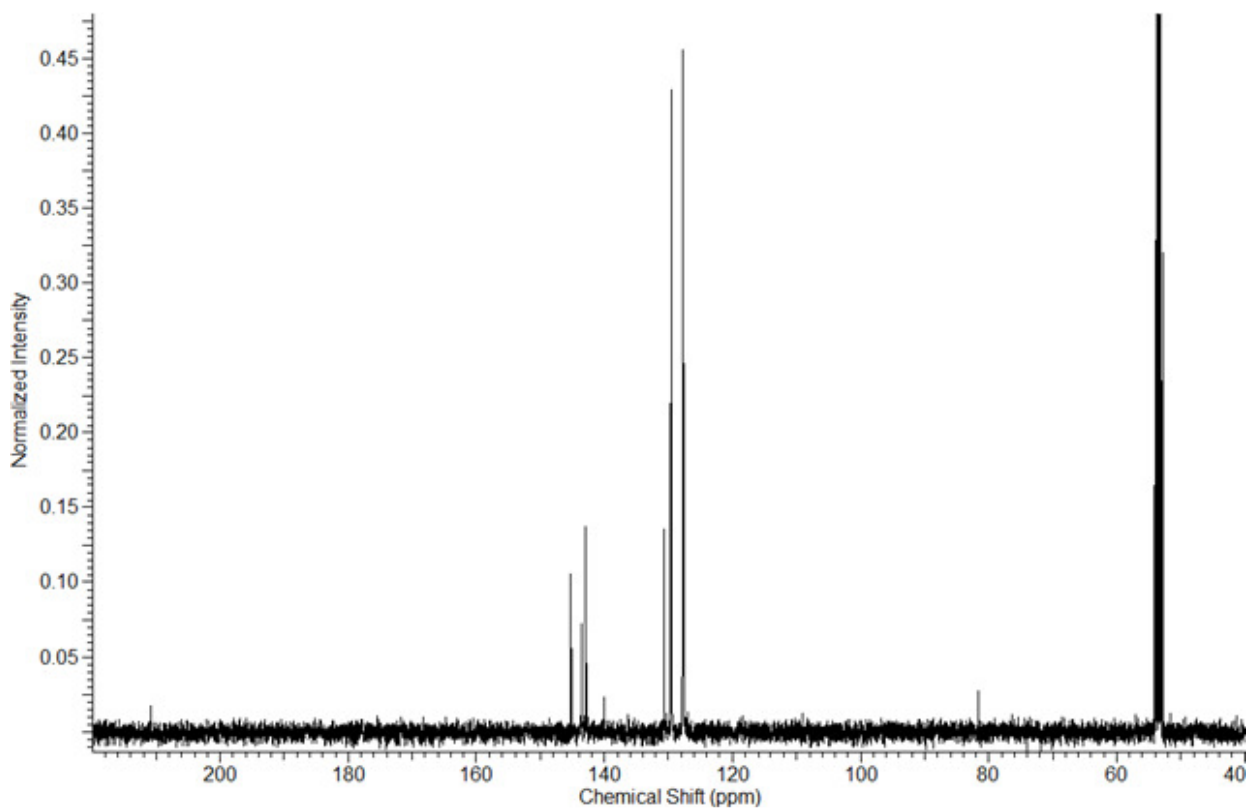



**Figure S19.**  $^{19}\text{F}$  NMR spectrum ( $\text{CD}_3\text{CN}$ ) of  $[\text{CPh}_3][\text{NbF}_6]$ , **2**.

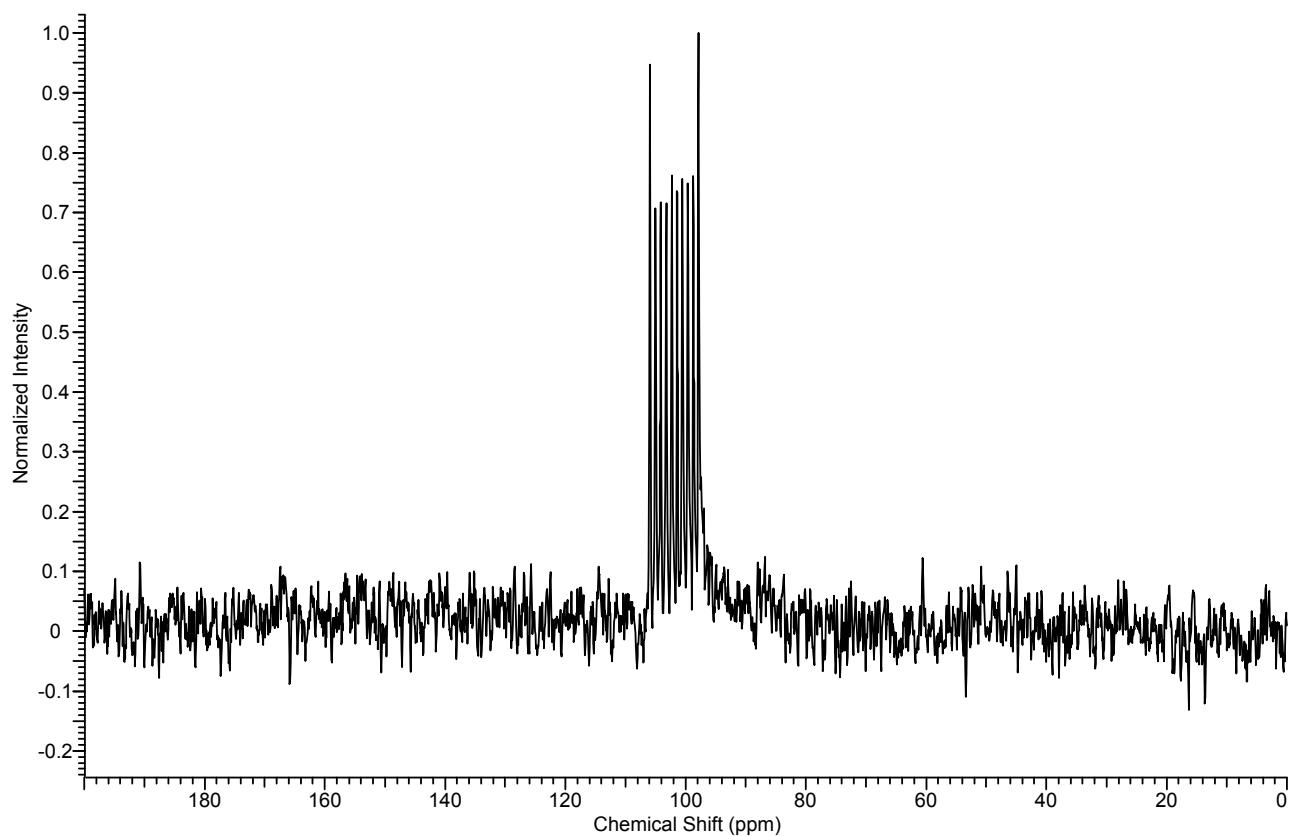

**Figure S20.**  $^{93}\text{Nb}$  NMR spectrum ( $\text{CD}_3\text{CN}$ ) of  $[\text{CPh}_3][\text{NbF}_6]$ , **2**.

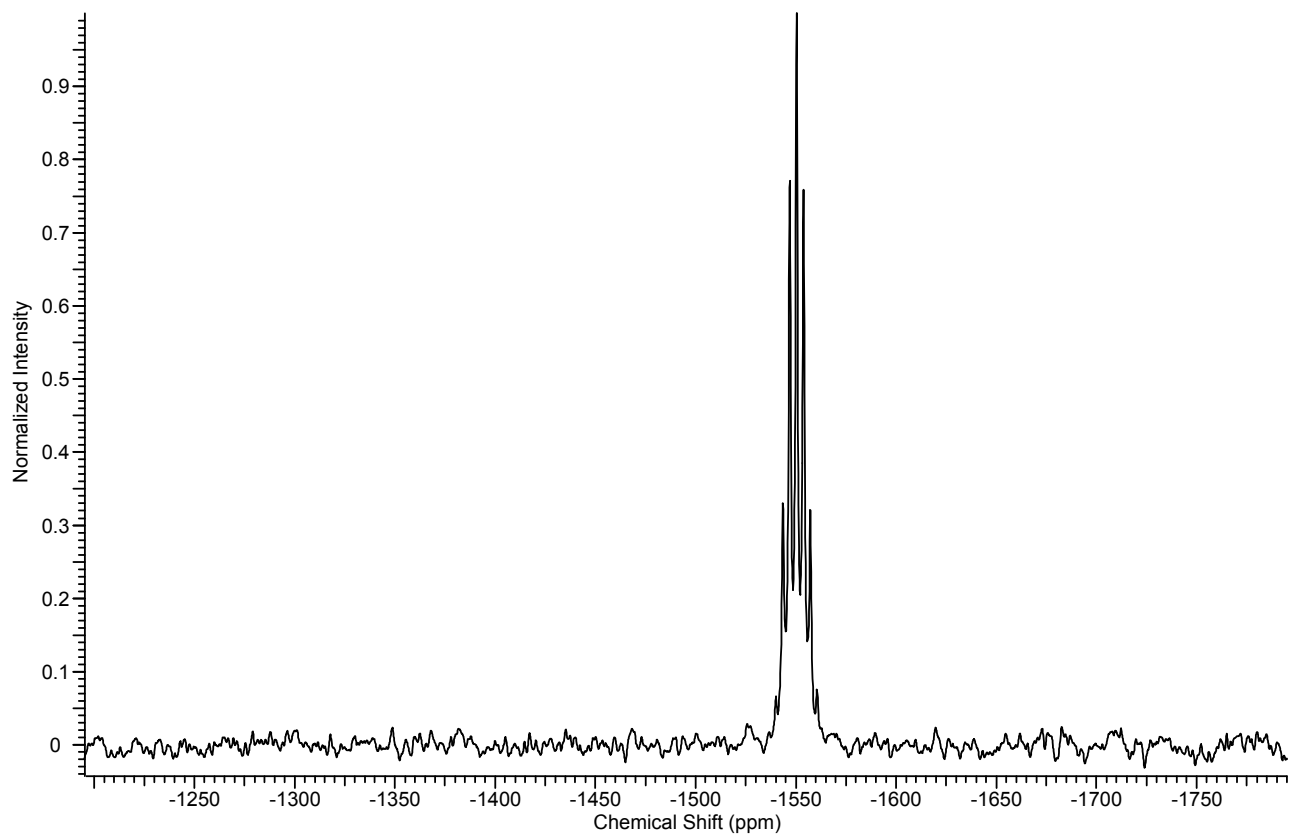

**Figure S21.**  $^1\text{H}$  NMR spectrum (401 MHz,  $\text{CD}_2\text{Cl}_2$ ) of  $[\text{CPh}_3][\text{NbCl}_6]$ , **3**.

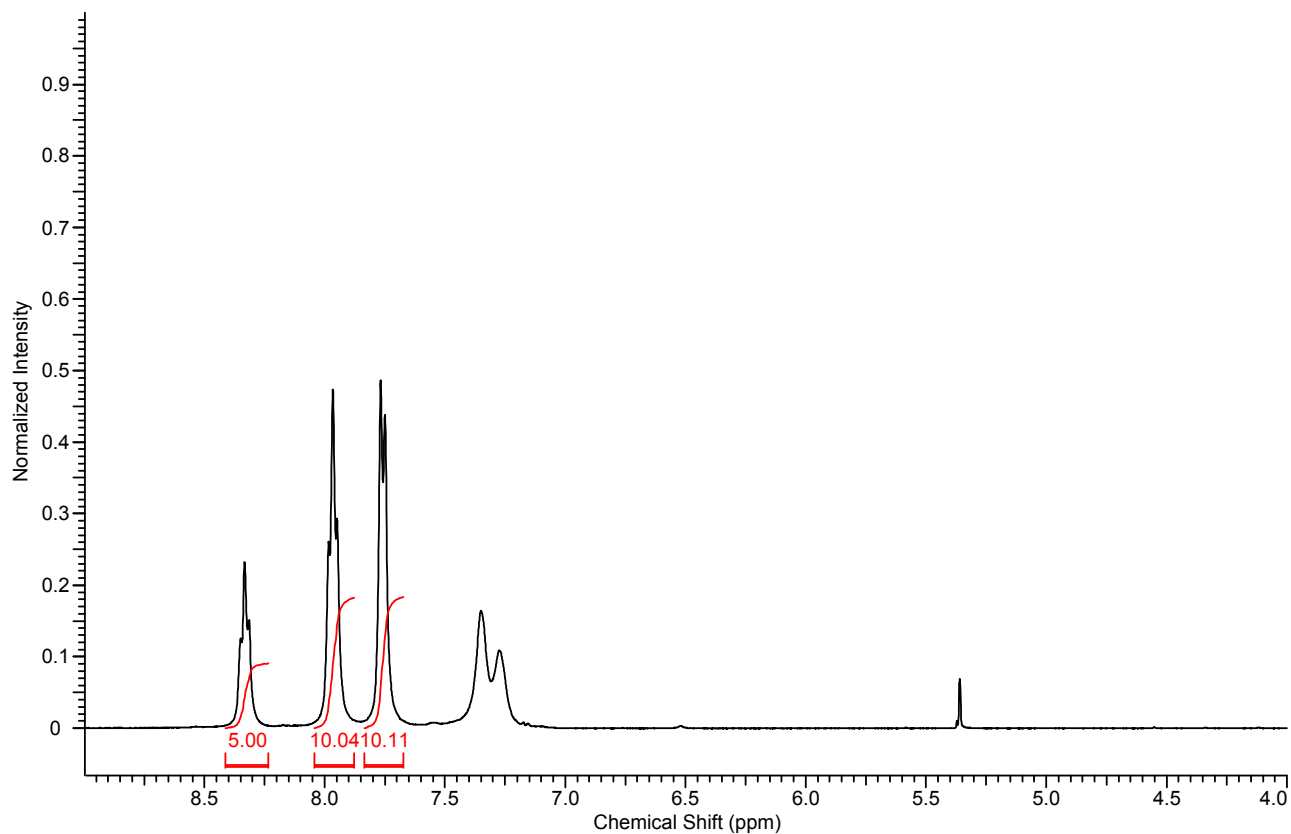

**Figure S22.**  $^{13}\text{C}\{^1\text{H}\}$  NMR spectrum (101 MHz,  $\text{CD}_2\text{Cl}_2$ ) of  $[\text{CPh}_3][\text{NbCl}_6]$ , **3**.

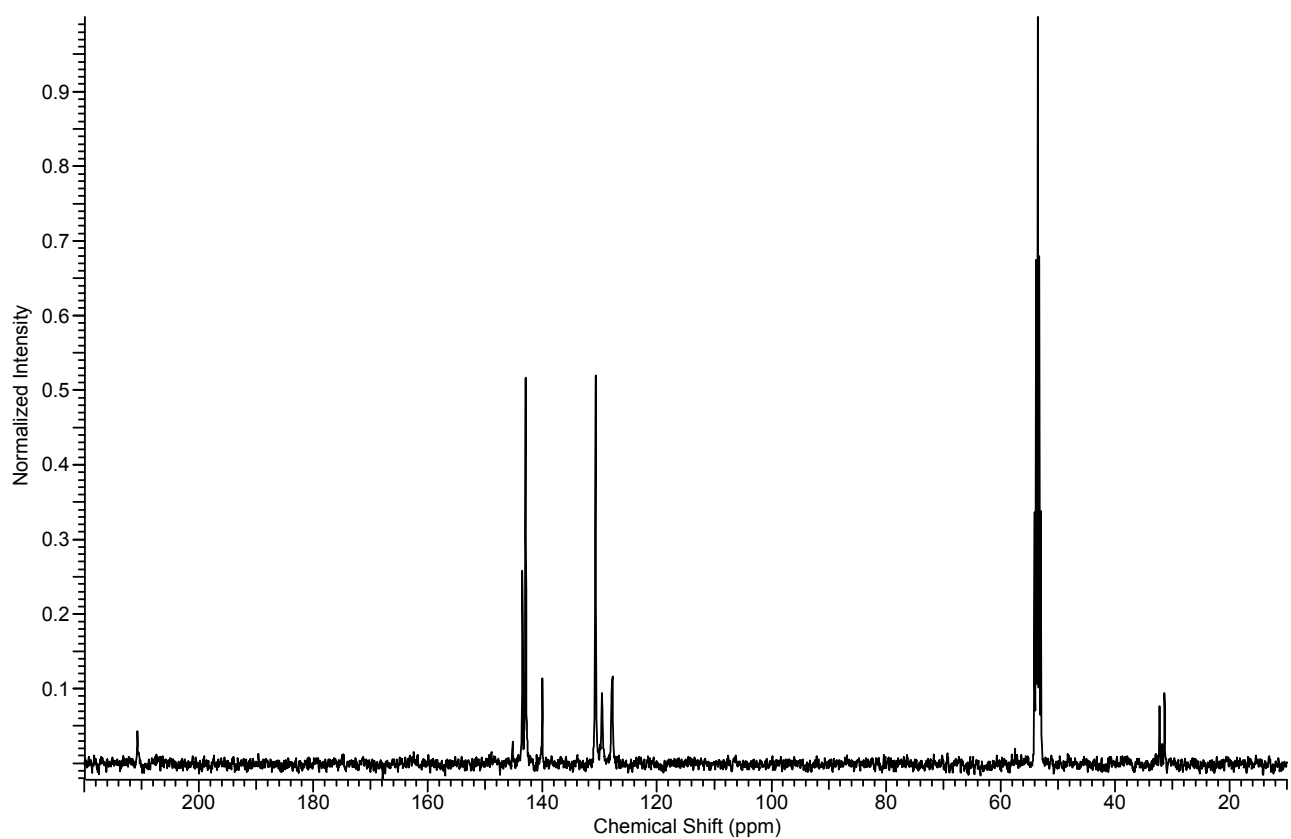

**Figure S23.**  $^1\text{H}$  NMR spectrum (401 MHz,  $\text{CD}_2\text{Cl}_2$ ) of **5a**.

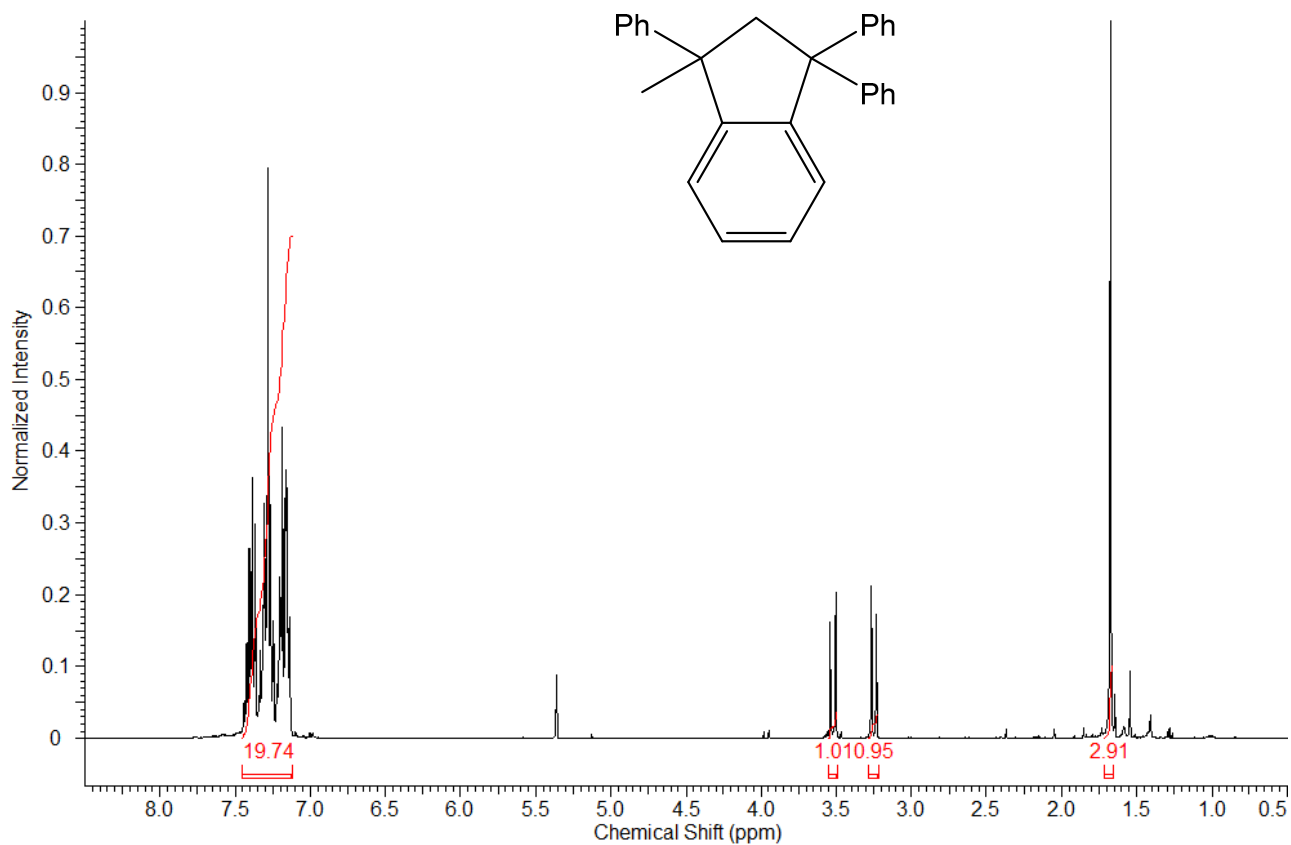

**Figure S24.**  $^{13}\text{C}\{^1\text{H}\}$  NMR spectrum (101 MHz,  $\text{CD}_2\text{Cl}_2$ ) of **5a**.

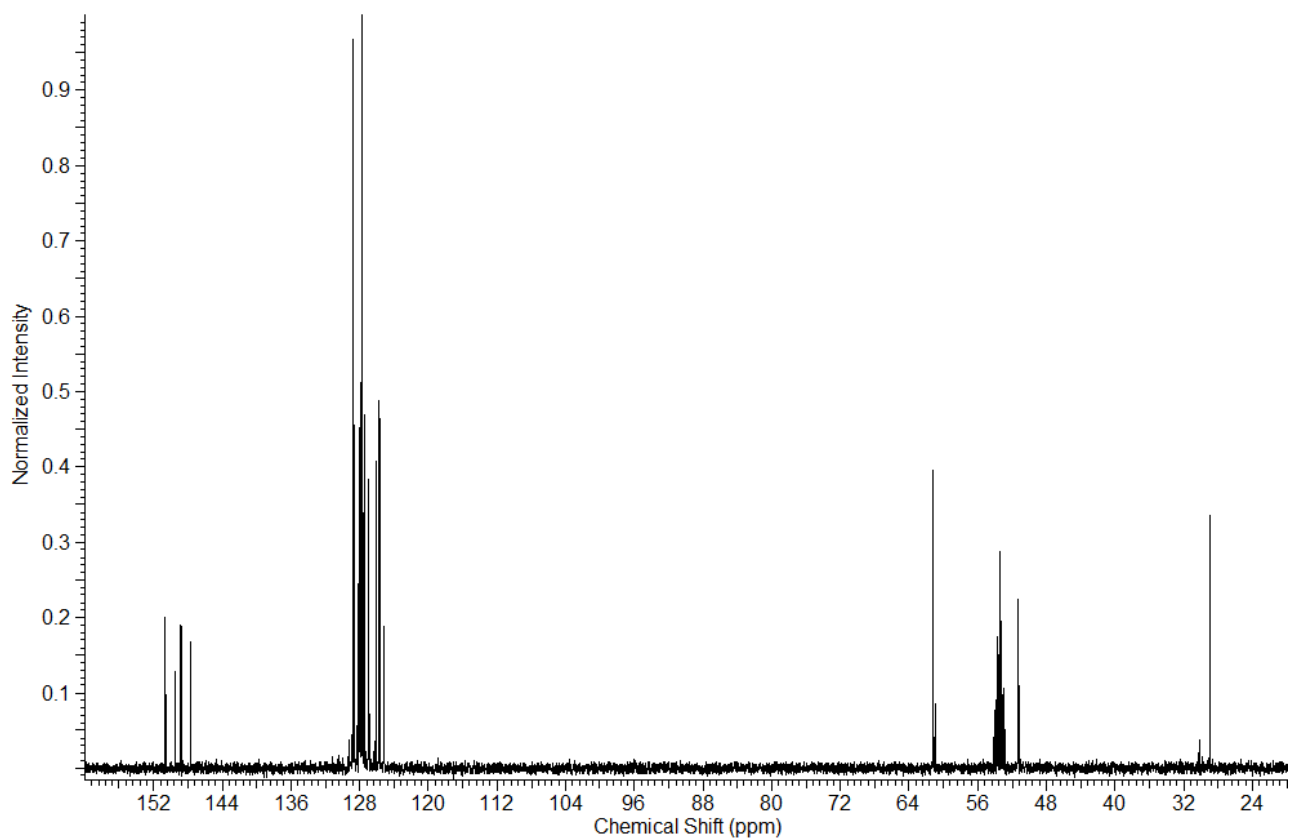

**Figure S25.**  $^1\text{H}$  NMR spectrum (401 MHz,  $\text{CD}_2\text{Cl}_2$ ) of **5b**.

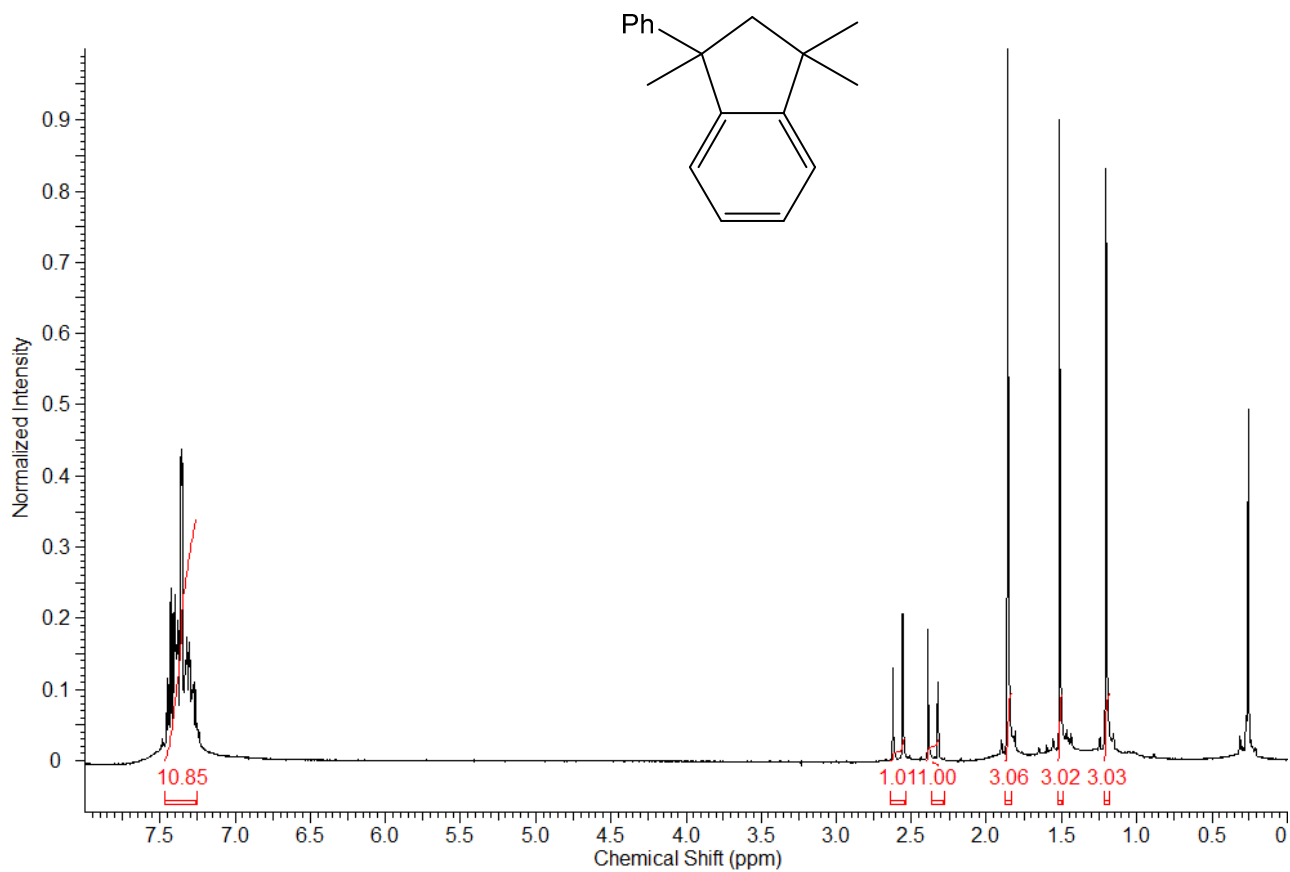

**Figure S26.**  $^{13}\text{C}\{^1\text{H}\}$  NMR spectrum (101 MHz,  $\text{CD}_2\text{Cl}_2$ ) of **5b**.

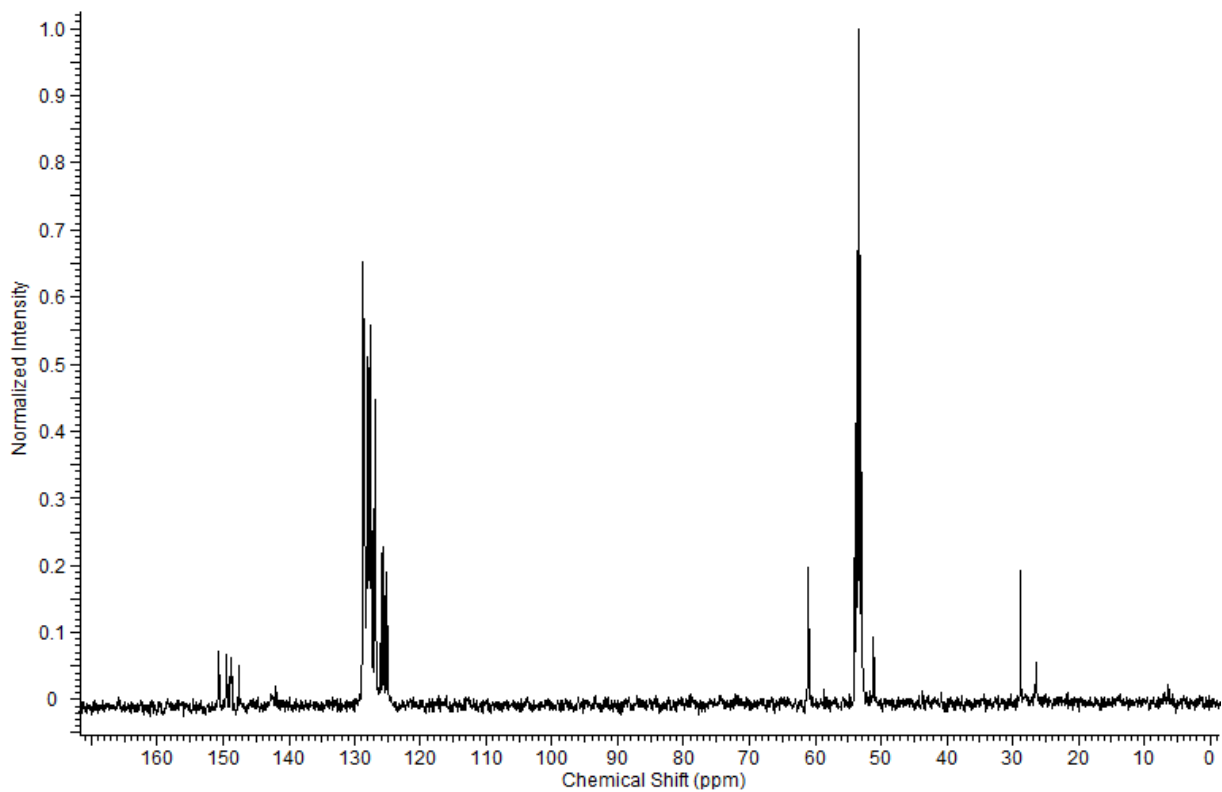

**Figure S27.**  $^1\text{H}$  NMR spectrum (401 MHz,  $\text{CD}_2\text{Cl}_2$ ) of  $\text{NbCl}_4(\text{O}_2\text{CCHPh}_2)$ , **6**.

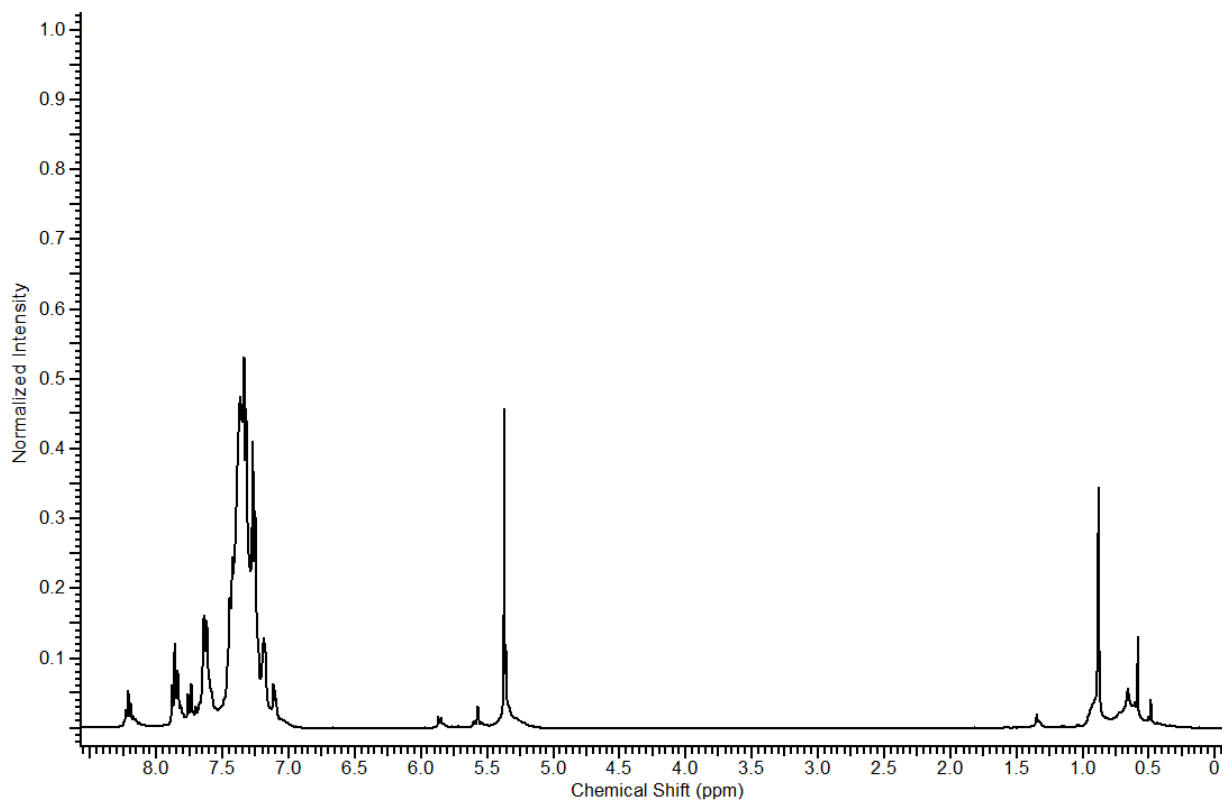

**Figure S28.**  $^{13}\text{C}\{^1\text{H}\}$  NMR spectrum (101 MHz,  $\text{CD}_2\text{Cl}_2$ ) of  $\text{NbCl}_4(\text{O}_2\text{CCHPh}_2)$ , **6**.

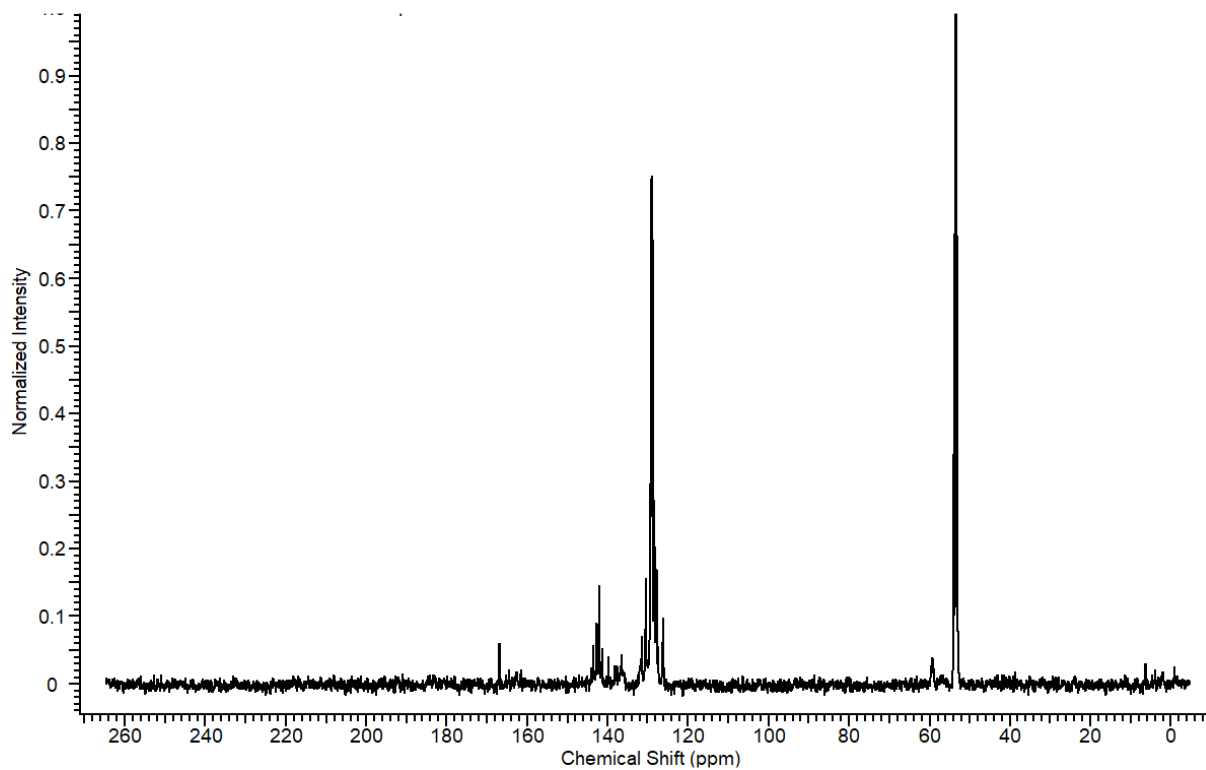

**Figure S29.**  $^1\text{H}$  NMR spectrum (401 MHz,  $\text{CDCl}_3$ ) of 3,3-diphenyldihydrofuran-2(3H)-one, **7**.

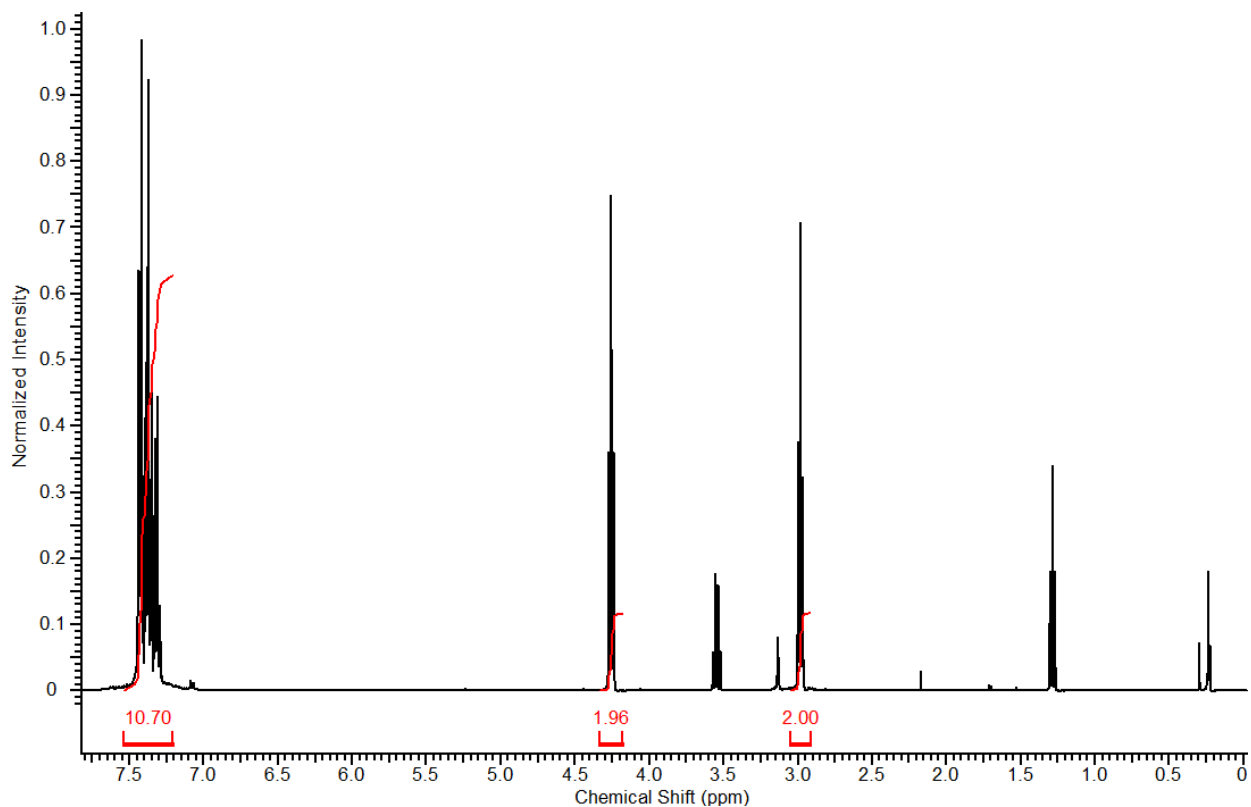

**Figure S30.**  $^{13}\text{C}\{^1\text{H}\}$  NMR spectrum (101 MHz,  $\text{CDCl}_3$ ) of 3,3-diphenyldihydrofuran-2(3H)-one, **7**.

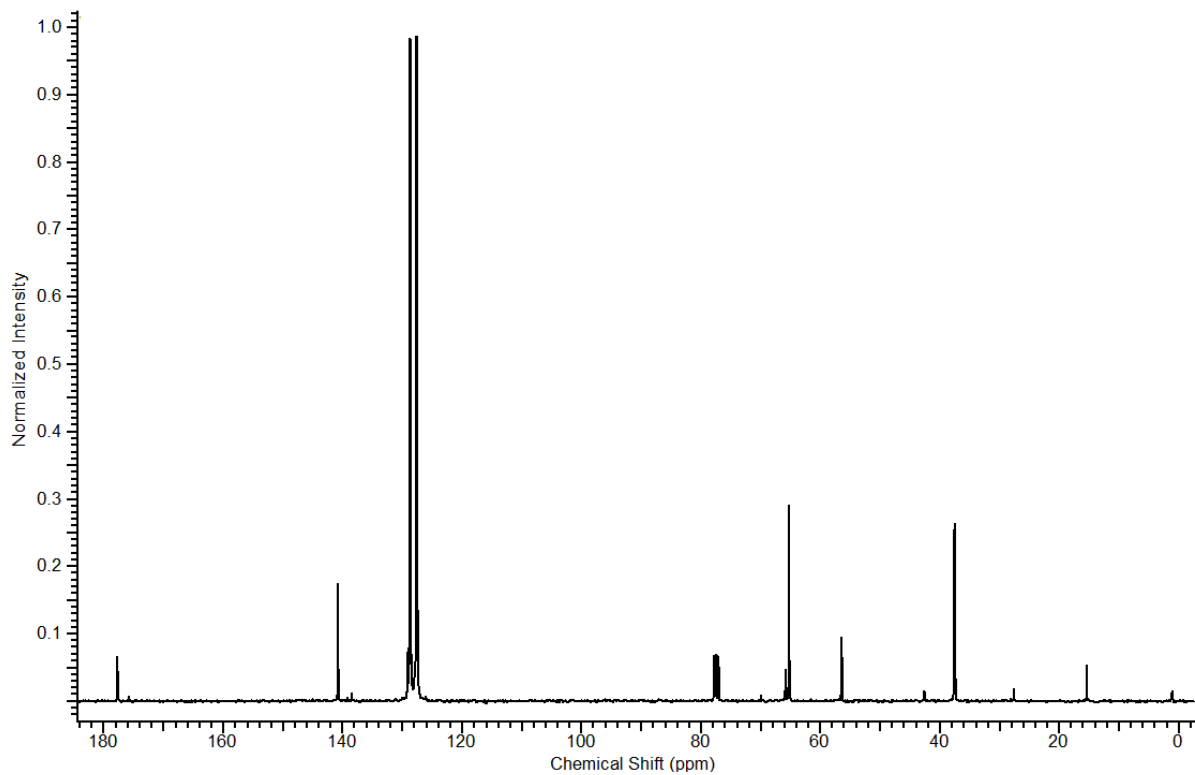

**Figure S31.**  $^1\text{H}$  NMR spectrum (401 MHz,  $\text{CDCl}_3$ ) of  $\text{MeC}(\text{Cl})=\text{CHCOOH}$ , **8**.

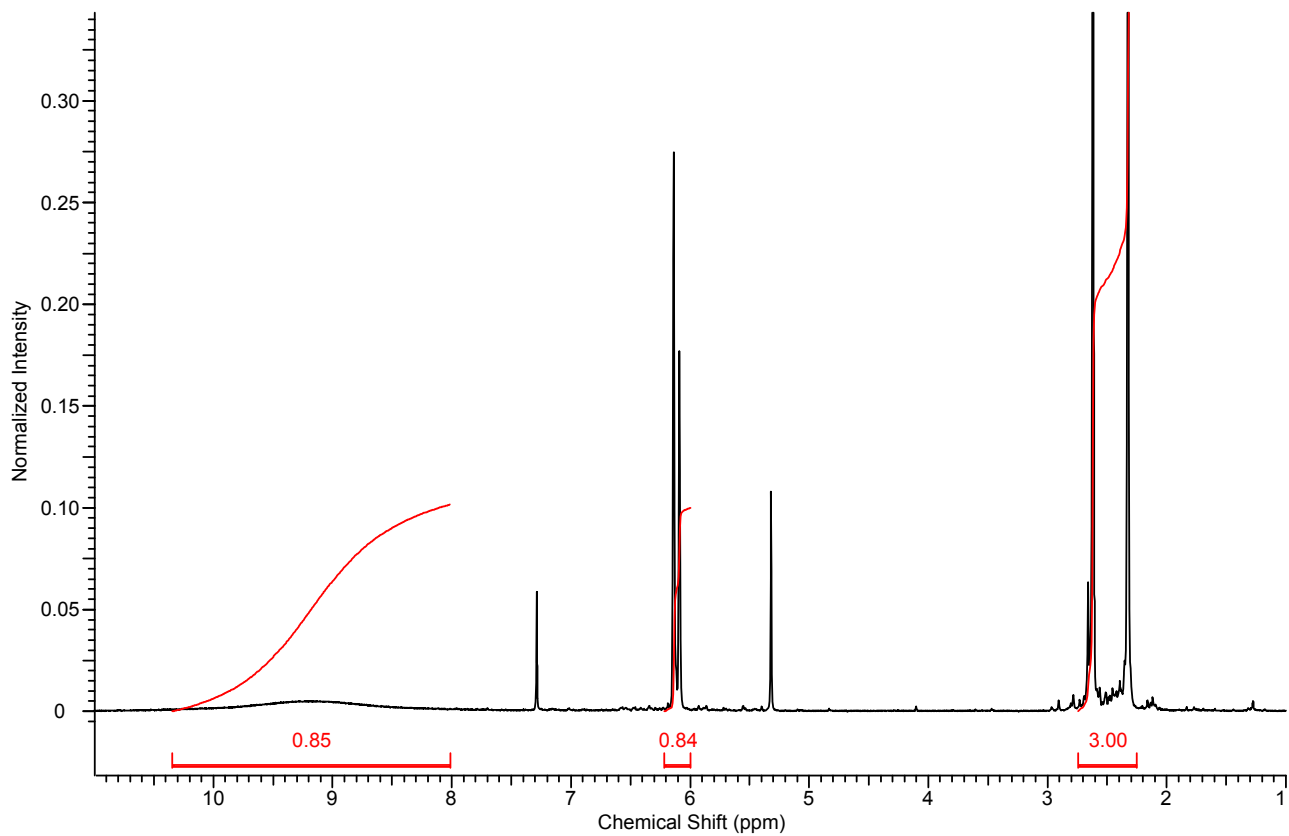

**Figure S32.**  $^{13}\text{C}\{^1\text{H}\}$  NMR spectrum (101 MHz,  $\text{CDCl}_3$ ) of  $\text{MeC}(\text{Cl})=\text{CHCOOH}$ , **8**.

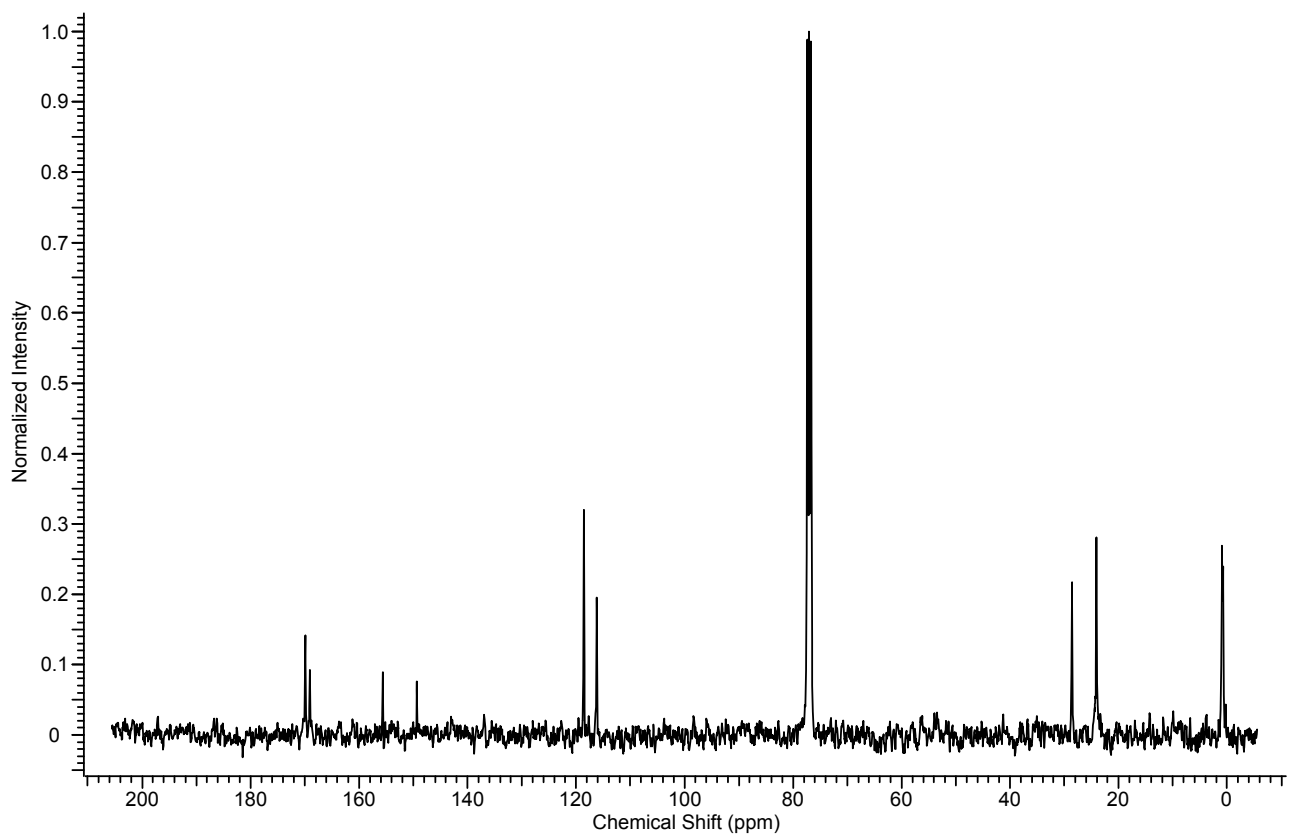

**Figure S33.** IR (ATR) spectrum of  $[\text{CPh}_3][\text{MoOCl}_4]$ , **1**.

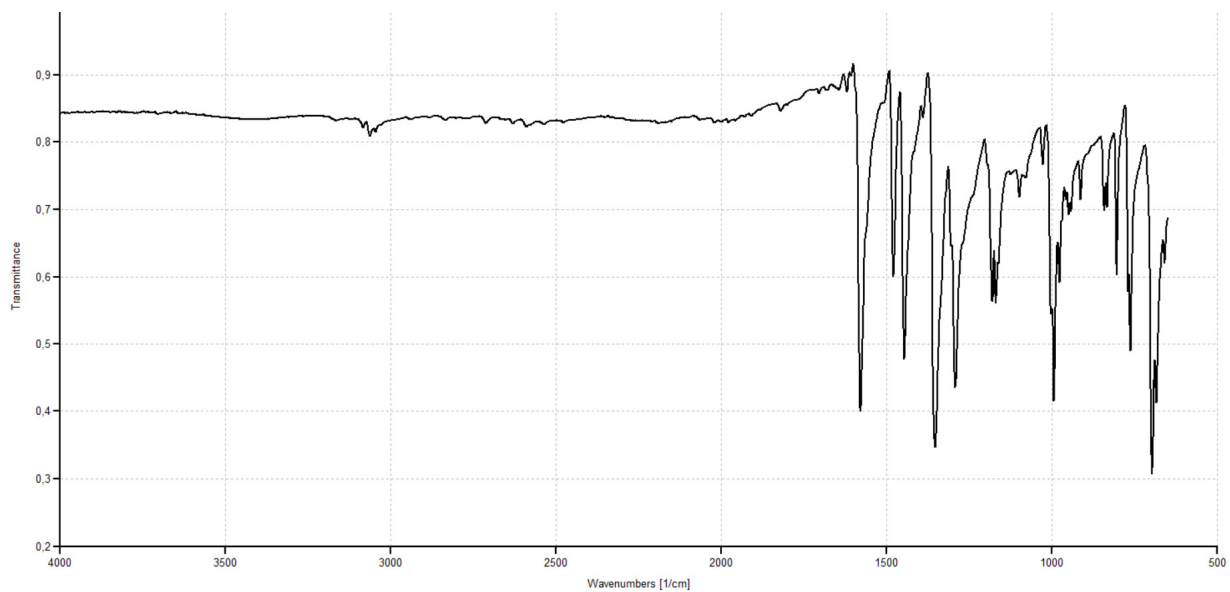

**Figure S34.** IR (ATR) spectrum of  $[\text{CPh}_3][\text{NbF}_6]$ , **2**.

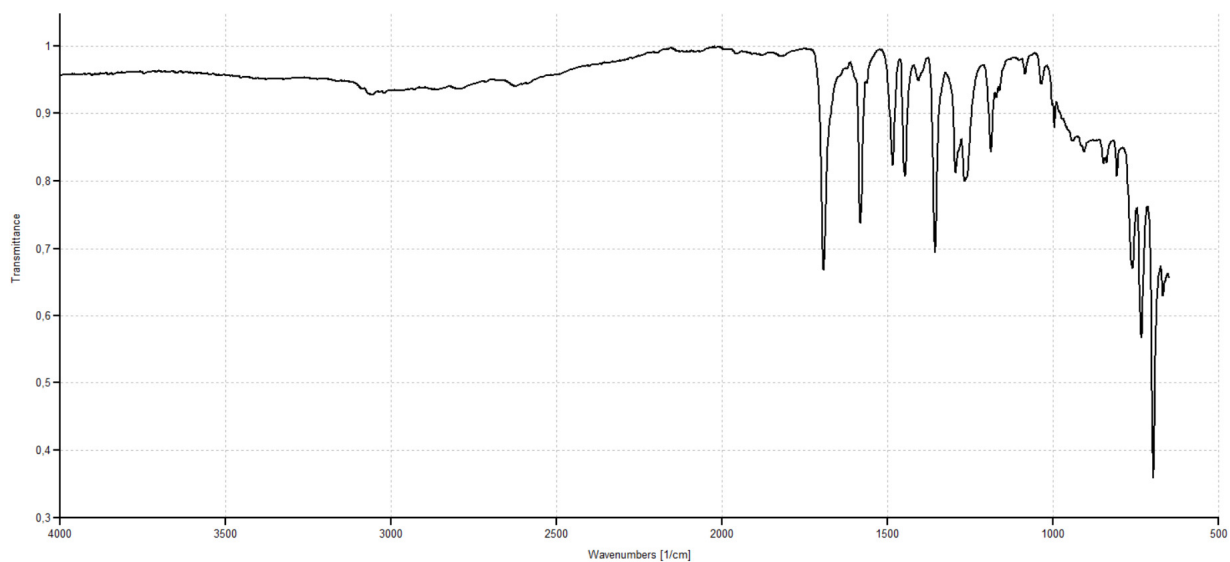

**Figure S35.** IR (ATR) spectrum of  $[\text{CPh}_3][\text{NbCl}_6]$ , **3**.

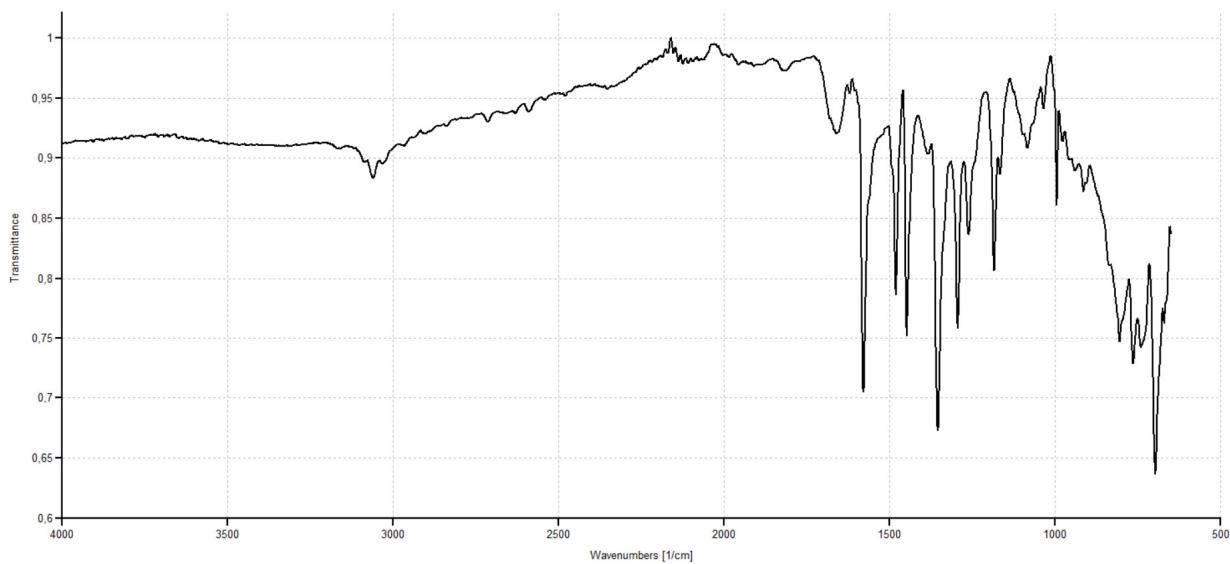



**Figure S36.** IR (ATR) spectrum of  $[\text{CPh}_3][\text{Ti}_2\text{Cl}_8(\mu-\kappa^2\text{-O}_2\text{CCPh}_3)]$ , **4**.

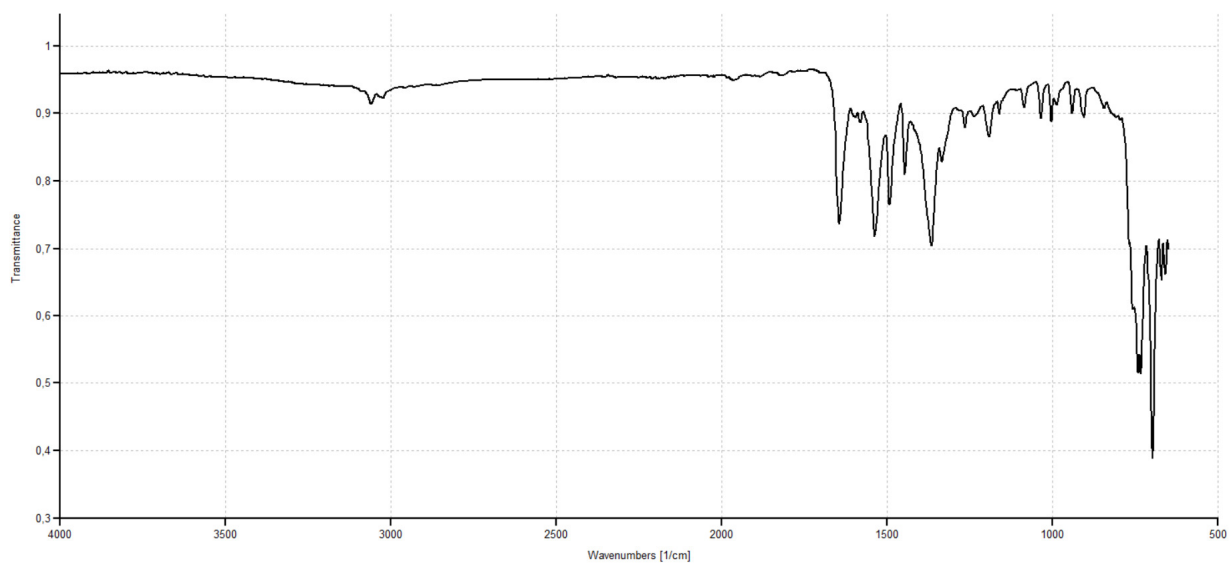

**Figure S37.** IR (ATR) spectrum of  $\text{NbCl}_4(\text{O}_2\text{CCHPh}_2)$ , **6**.

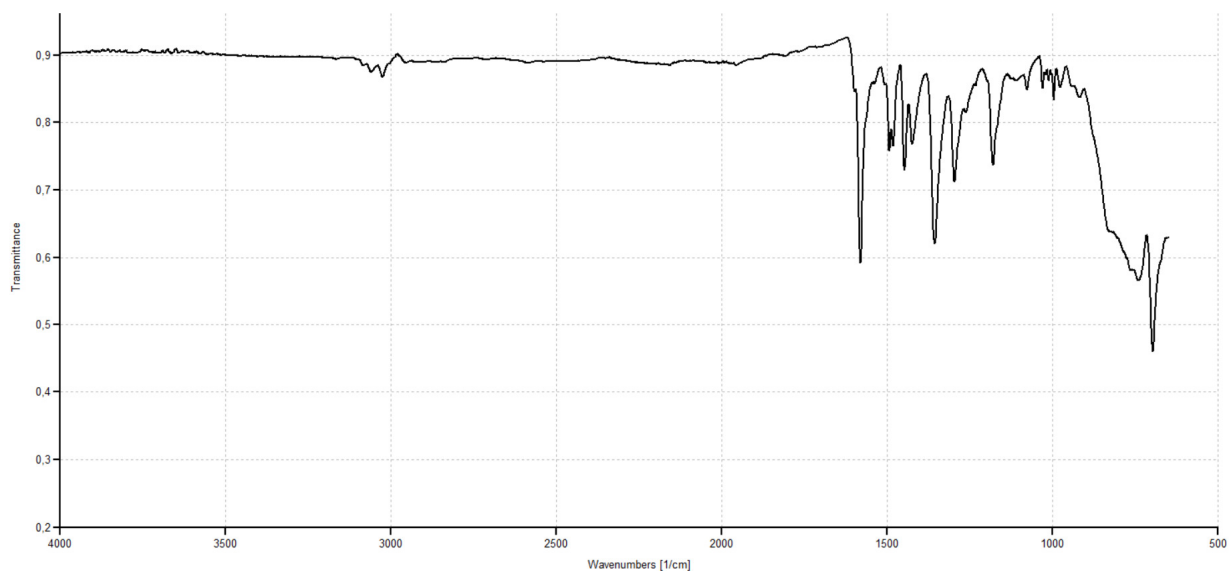

**Figure S38.** IR (ATR) spectrum of 3,3-diphenyldihydrofuran-2(3H)-one, **7**.

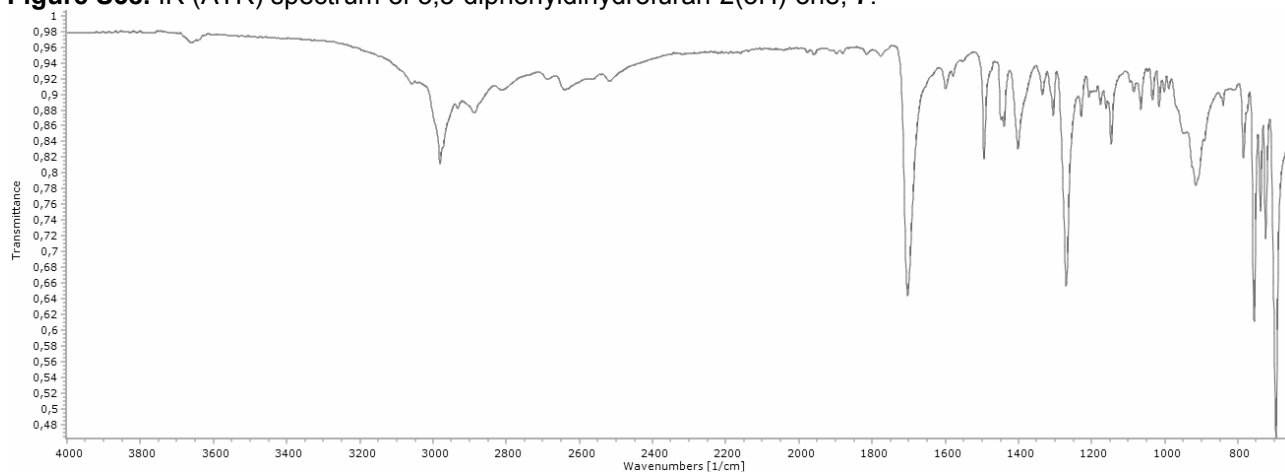

**Figure S39.** IR (ATR) spectrum of MeC(Cl)=CHCOOH, **8**.

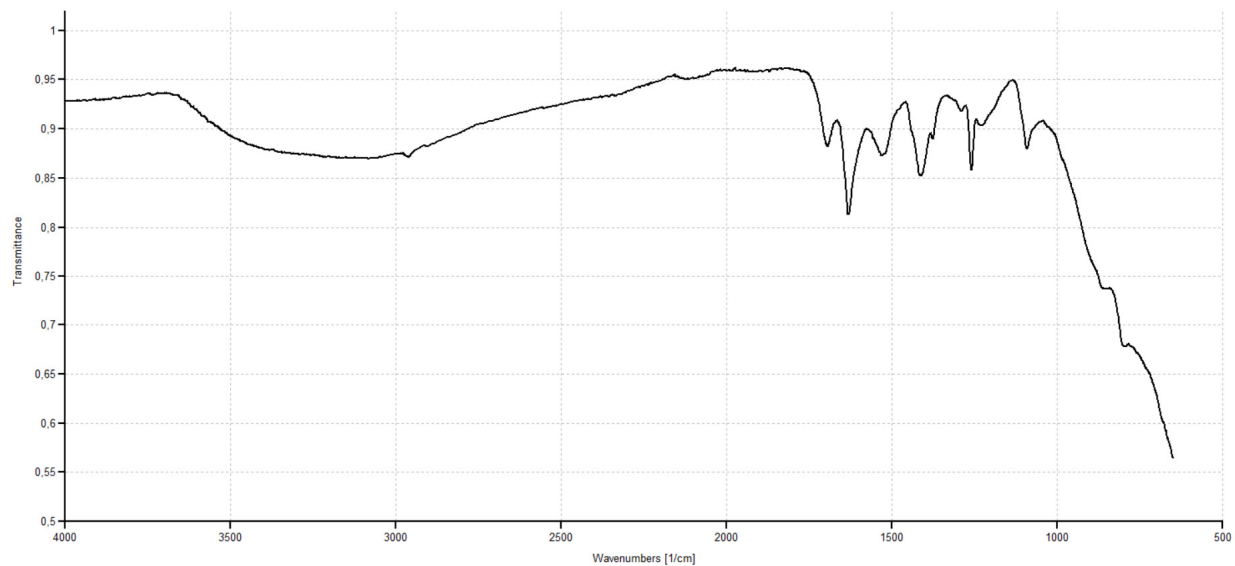

Supplement: c9dt00551j1.pdf [file c9dt00551j1.pdf]
